# Supplementary material
Source: MDPI journal article supplement (https://www.mdpi.com/2072-4292/12/8/1231)
Supplement: s1 [file s1]

# **Precipitation-sensitive dynamic threshold: a new and simple method to detect and monitor forest and woody vegetation cover in humid to arid areas**

Ron Drori, Harel Dan, Michael Sprintsin, Efrat Sheffer

## **Supplementary Materials**

### **S1. Validation analyses using three delineation approaches.**

**Table S1.** Validation results of woody and non-woody delineation using a constant threshold of NDVI=0.2.

**Table S2.** Validation results of woody and non-woody delineation using the Hanssen tree cover database.

**Table S3.** Validation results of woody and non-woody delineation using a precipitation-sensitive dynamics threshold.

**Table S1. Validation results of woody and non-woody delineation using a constant threshold of NDVI=0.2.**

Cohen's Kappa: 0.63

Accuracy: 0.82

| <b>Vegetation type</b> | <b>Precision</b> | <b>Recall</b> | <b>F1-score</b> | <b>Support</b> |
|------------------------|------------------|---------------|-----------------|----------------|
| Not woody              | 0.99             | 0.75          | 0.86            | 4032           |
| Woody                  | 0.63             | 0.98          | 0.77            | 1717           |

**Table S2. Validation results of woody and non-woody delineation using the Hanssen tree cover database.**

Cohen's Kappa: 0.62

Accuracy: 0.86

| <b>Vegetation type</b> | <b>Precision</b> | <b>Recall</b> | <b>F1-score</b> | <b>Support</b> |
|------------------------|------------------|---------------|-----------------|----------------|
| Not woody              | 0.84             | 0.99          | 0.86            | 4032           |
| Woody                  | 0.95             | 0.56          | 0.77            | 1717           |

**Table S3. Validation results of woody and non-woody delineation using a precipitation-sensitive dynamics threshold.**

Cohen's Kappa: 0.80

Accuracy: 0.91

| <b>Vegetation type</b> | <b>Precision</b> | <b>Recall</b> | <b>F1-score</b> | <b>Support</b> |
|------------------------|------------------|---------------|-----------------|----------------|
| Not woody              | 0.96             | 0.991         | 0.94            | 4032           |
| Woody                  | 0.81             | 0.92          | 0.86            | 1717           |
